# Supplementary material for: Accurate simulation of transient landscape evolution by eliminating numerical diffusion: the TTLEM 1.0 model
Source: Copernicus journal article supplement (doi:10.5194/esurf-5-47-2017), 2017-01-18
Supplement: Supplementary file 1 [file esurf-5-47-2017-supplement.zip]

**Movie S1.** A synthetic steady state landscape produced as the testing environment to verify and compare the different numerical schemes implemented in TTLEM. Model runtime was 150 Myr, uplift rate was assumed to be spatially uniform over the area (block uplift) and fixed to  $10^{-3}\text{m yr}^{-1}$ . Other model parameter values are listed in Table 1.
