# Supplementary material for: Accurate simulation of transient landscape evolution by eliminating numerical diffusion: the TTLEM 1.0 model
Source: Copernicus journal article supplement (doi:10.5194/esurf-5-47-2017), 2017-01-18
Supplement: Supplementary file 2 [file esurf-5-47-2017-supplement.zip]

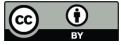

## *Supplement of*

# **Accurate simulation of transient landscape evolution by eliminating numerical diffusion: the TTLEM 1.0 model**

**Benjamin Campforts et al.**

*Correspondence to:* Benjamin Campforts ([benjamin.campforts@kuleuven.be](mailto:benjamin.campforts@kuleuven.be))

- [esurf-5-47-2017-supplement-title-page.pdf](#)
- [Supplement\\_TTLEM](#)
  - [Movie 1.mp4](#)
  - [Supplement to TTLEM Campforts et al.docx](#)
  - [Supplement to TTLEM Campforts et al.pdf](#)

The copyright of individual parts of the supplement might differ from the CC-BY 3.0 licence.
